# Supplementary material for: Binding symmetric porphyrins to the c-MYC promoter Pu24I G-quadruplex: toward more specific ligand recognition by flanking bases
Source: Royal Society of Chemistry journal article supplement (doi:10.1039/d3nj00956d), 2023-01-01
Supplement: d3nj00956d1.pdf [file d3nj00956d1.pdf]

## Binding symmetric porphyrins to c-MYC promoter Pu24I G-quadruplex: toward more specific ligand recognition by flanking bases

Ivana Stanković,<sup>a</sup> Sonja Zrilić,<sup>b</sup> Branislav Milovanović,<sup>c</sup> Ana Stanojević,<sup>c</sup>  
Milena Petković\*<sup>c</sup> and Mihajlo Etinski\*<sup>c</sup>

<sup>a</sup> Institute of Chemistry, Technology and Metallurgy, Njegoševa 12, 11 000 Belgrade, Serbia

<sup>b</sup> Innovation Center of the Faculty of Chemistry, Studentski trg 12-16, 11158 Belgrade, Serbia

<sup>c</sup> University of Belgrade – Faculty of Physical Chemistry, Studentski trg 12-16, 11 158 Belgrade, Serbia

\*To whom correspondence should be addressed; E-mail: milena@ffh.bg.ac.rs, etinski@ffh.bg.ac.rs

Supporting Information

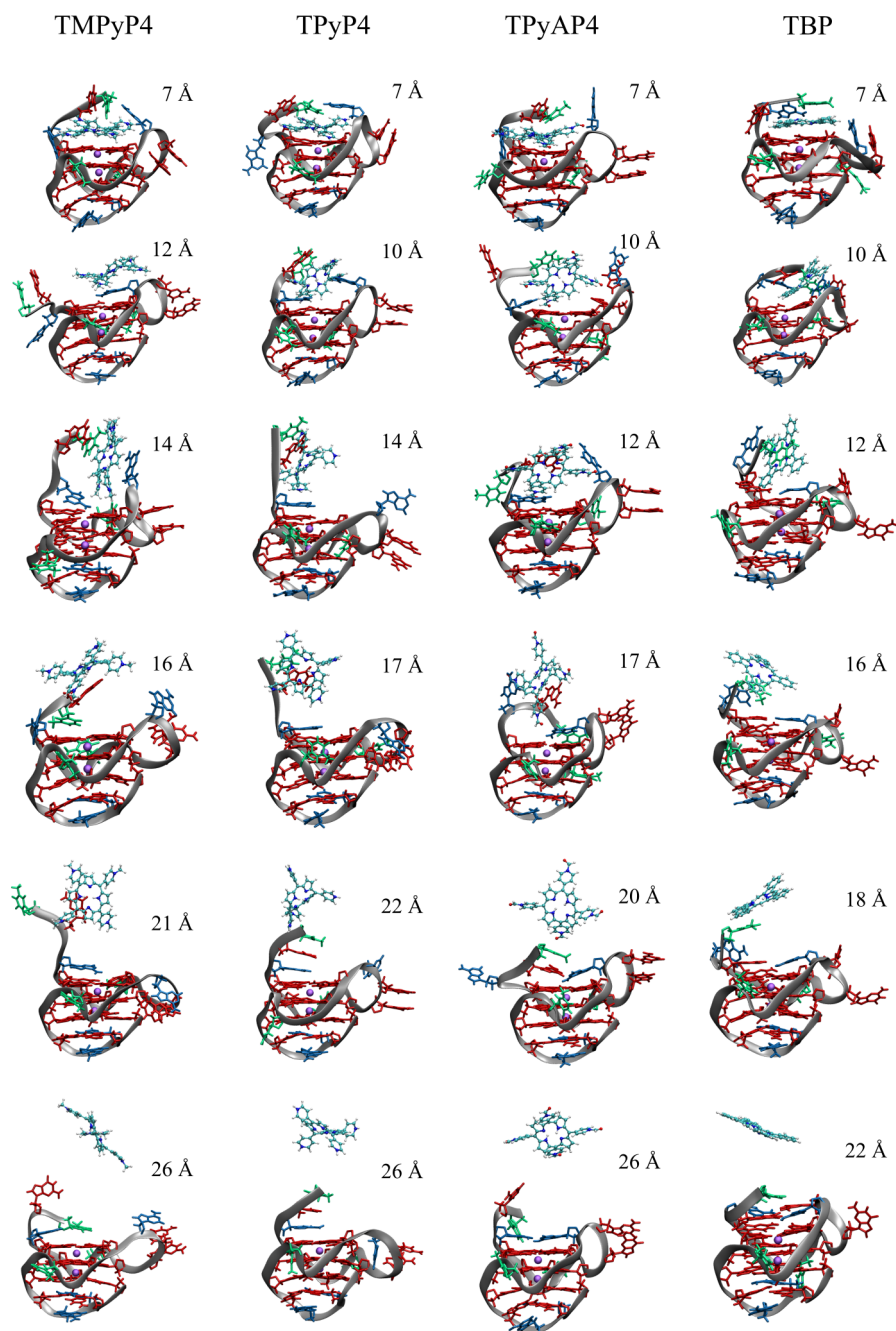

Figure S1: Selected structures from ABF simulations and their ligand–G-quadruplex distances. Colour code is the same as in Figure 2.

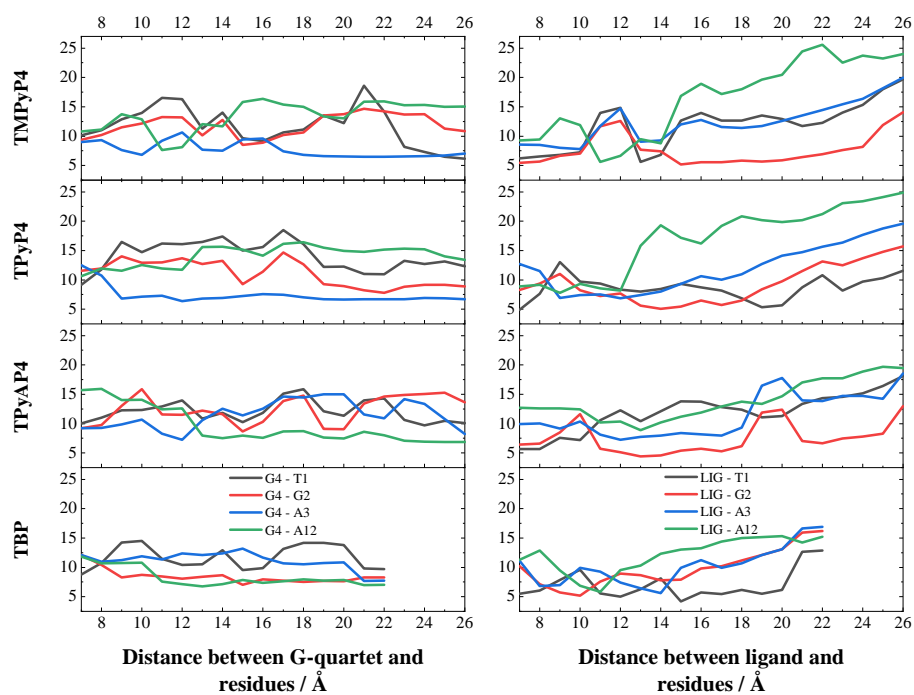

Figure S2: Average distances between selected bases and the top G-quartet (left) or a ligand (right) along a path of minimum free energy. The distances were computed from the coordinate origin.

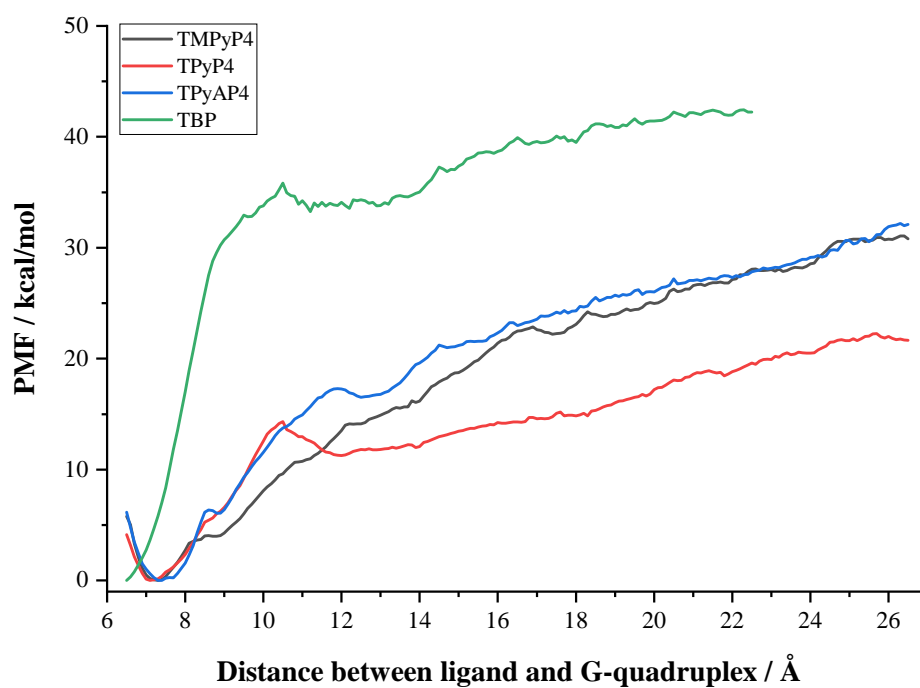

Figure S3: Potential of mean force along a minimum energy path. The distances were computed from the coordinate origin.

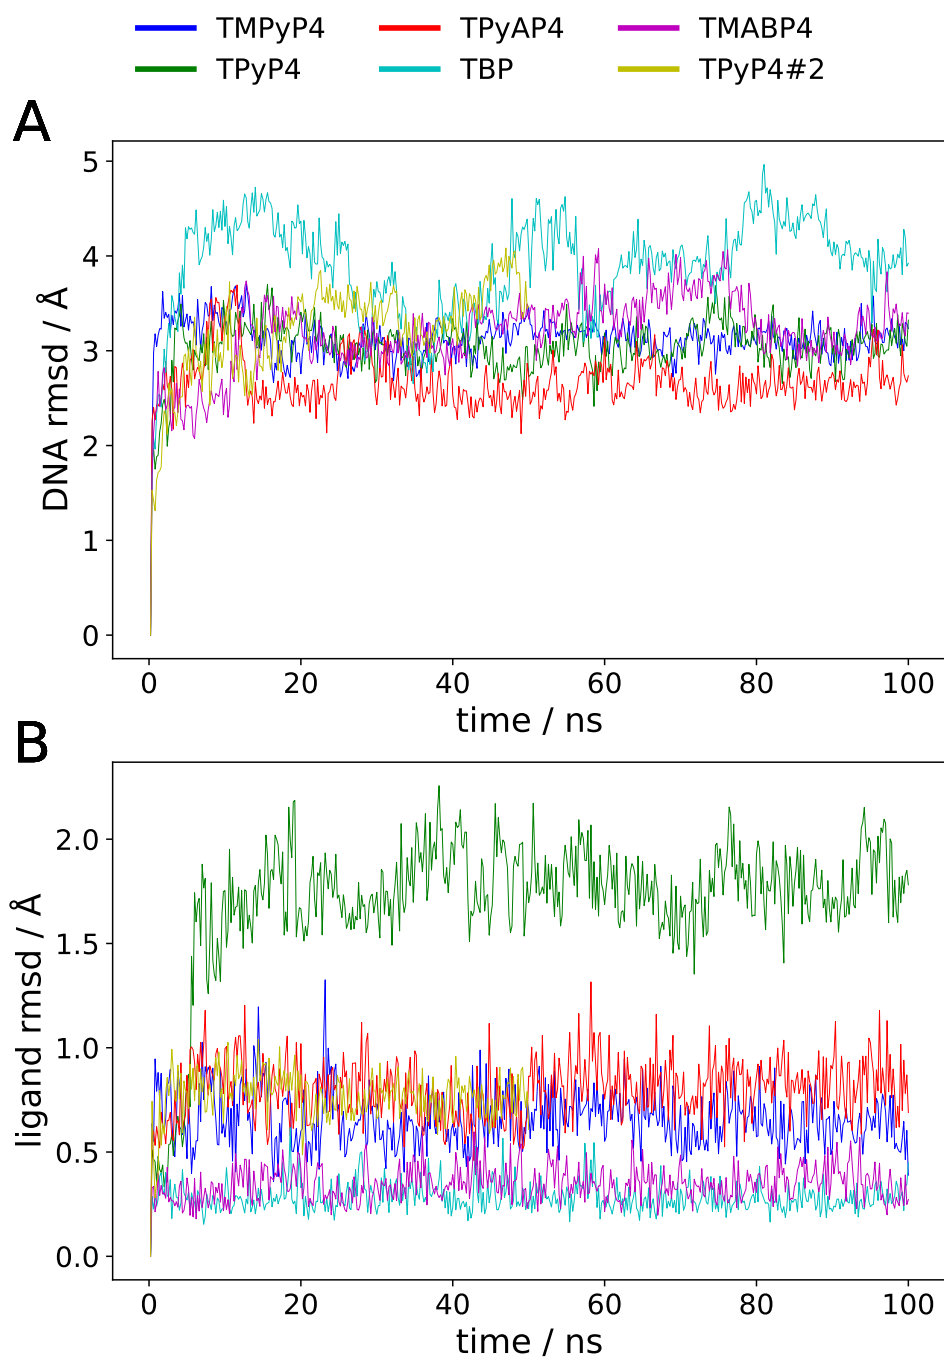

Figure S4: RMSD of A) G-quadruplex and B) ligands in simulations with different ligands.

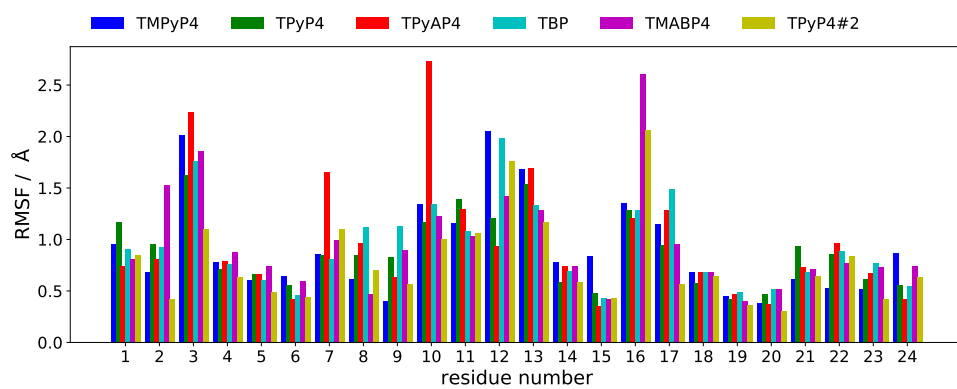

Figure S5: RMSF of G-quadruplex's residues in complexes.

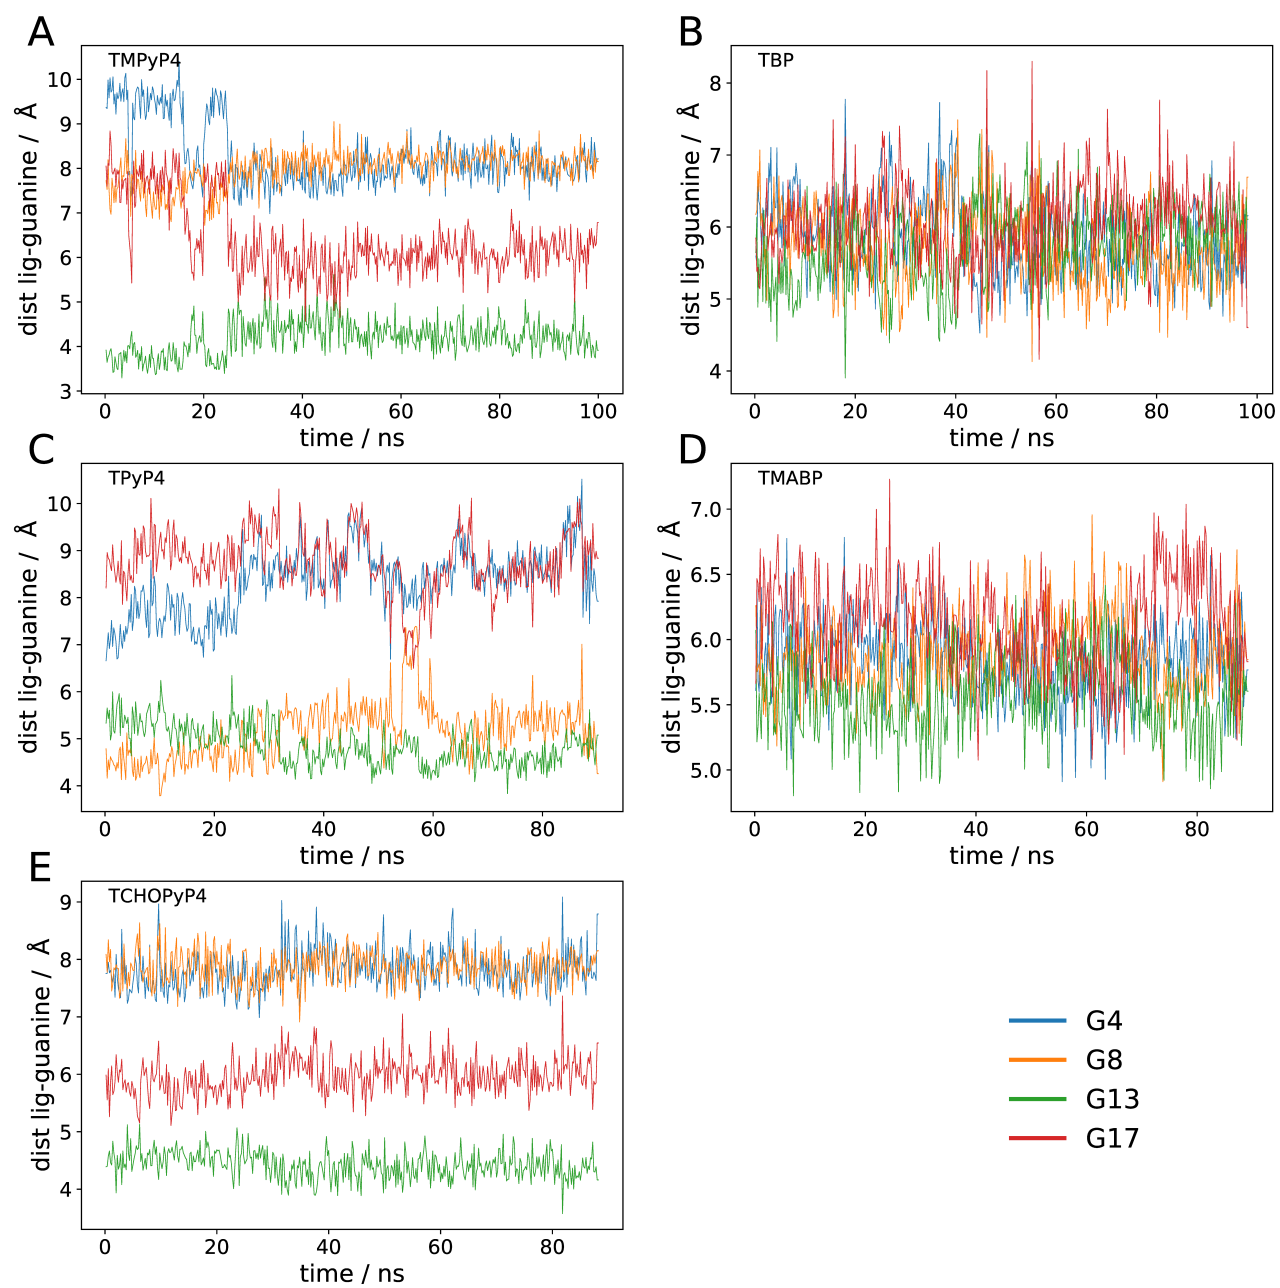

Figure S6: Distances between the geometric centers of the ligands and each guanine from the top G-quartet.
